# Supplementary material for: Influence of the Antibiotic Oxytetracycline on the Morphometric Characteristics and Endophytic Bacterial Community of Lettuce (Lactuca sativa L.)
Source: MDPI journal article supplement (doi:10.3390/microorganisms11122828), 2023-11-21
Supplement: s1 [file s1]

Table S2: High-throughput sequencing data analysis.

|                             |       | sample name | sample-id | Raw reads | N of chimeras | Non-chimeric reads | Reads with OTU | OTU per sample | Faith's PD  | chao1       | observed_otus | shannon     | simpson     |
|-----------------------------|-------|-------------|-----------|-----------|---------------|--------------------|----------------|----------------|-------------|-------------|---------------|-------------|-------------|
| experiment with hydroponics | water | W-Cont      | 1         | 45625     | 11697         | 33928              | 33193          | 1772           | 76.06831    | 2211.507614 | 1772          | 7.431143841 | 0.979094111 |
|                             |       | W-Cont      | 2         | 46543     | 10023         | 30223              | 29995          | 1463           | 74.05586001 | 2511.567479 | 1357          | 7.877654877 | 0.965786959 |
|                             |       | W-Cont      | 3         | 41655     | 9866          | 35677              | 30235          | 1855           | 70.03461078 | 2868.678875 | 1855          | 7.375826546 | 0.971235895 |
|                             |       | W-OTC15     | 4         | 39360     | 6611          | 32749              | 32449          | 785            | 37.44875    | 1020.360656 | 785           | 5.068225593 | 0.921092377 |
|                             |       | W-OTC15     | 5         | 32546     | 7514          | 28564              | 36897          | 725            | 35.12345    | 1256.455554 | 756           | 5.147855854 | 0.935465469 |
|                             |       | W-OTC15     | 6         | 35254     | 7988          | 35549              | 28788          | 765            | 30.12389    | 1956.54787  | 705           | 5.014644457 | 0.924562124 |
|                             |       | W-OTC50     | 7         | 33293     | 6567          | 26726              | 26527          | 476            | 19.24951    | 598.46      | 476           | 4.425201543 | 0.902556272 |
|                             |       | W-OTC50     | 8         | 30542     | 7125          | 20056              | 20255          | 402            | 25.58454    | 369.57      | 386           | 4.945236779 | 0.929874563 |
|                             |       | W-OTC50     | 9         | 35956     | 6233          | 19852              | 19665          | 436            | 21.47478    | 487.66      | 425           | 4.656664113 | 0.912578955 |
|                             | leaf  | LW-Cont     | 10        | 32971     | 192           | 32779              | 32752          | 242            | 16.40142    | 456.097561  | 242           | 1.619807291 | 0.484610258 |
|                             |       | LW-Cont     | 11        | 38958     | 213           | 38745              | 38701          | 264            | 15.77534    | 578.2702703 | 264           | 1.631283769 | 0.49030914  |
|                             |       | LW-Cont     | 12        | 29122     | 121           | 29001              | 28984          | 241            | 15.51292    | 483.3846154 | 241           | 1.70326453  | 0.505899909 |
|                             |       | LW-OTC15    | 13        | 24544     | 108           | 24436              | 24421          | 170            | 9.52349     | 345.3846154 | 170           | 1.462524116 | 0.441184821 |
|                             |       | LW-OTC15    | 14        | 20690     | 105           | 20585              | 20569          | 145            | 7.81525     | 238.8571429 | 145           | 1.555337096 | 0.471319522 |
|                             |       | LW-OTC15    | 15        | 16465     | 134           | 23655              | 28257          | 205            | 10.34564    | 276.3647435 | 165           | 1.315556786 | 0.406874651 |
|                             |       | LW-OTC50    | 16        | 15263     | 55            | 15208              | 15193          | 156            | 15.90369    | 346.0434783 | 156           | 1.433566568 | 0.411877612 |
|                             |       | LW-OTC50    | 17        | 18642     | 96            | 13254              | 19423          | 184            | 12.35684    | 396.564858  | 204           | 1.256474585 | 0.556432165 |
|                             |       | LW-OTC50    | 18        | 12656     | 102           | 17514              | 16544          | 172            | 14.53486    | 421.3546847 | 186           | 1.554684651 | 0.498946545 |
|                             | root  | RW-Cont     | 19        | 12947     | 48            | 12899              | 12881          | 175            | 15.66044    | 373         | 175           | 1.720692595 | 0.498381652 |
|                             |       | RW-Cont     | 20        | 32645     | 181           | 32464              | 32375          | 348            | 29.99006    | 467.4358974 | 348           | 1.965670426 | 0.519864687 |
|                             |       | RW-Cont     | 21        | 36938     | 148           | 36790              | 36744          | 394            | 24.38093    | 561.037037  | 394           | 2.161723393 | 0.549737638 |
|                             |       | RW-OTC15    | 22        | 22680     | 86            | 22594              | 22560          | 260            | 18.06005    | 401.375     | 260           | 1.88626301  | 0.521228642 |
|                             |       | RW-OTC15    | 23        | 32489     | 281           | 32208              | 32146          | 331            | 21.86129    | 458.3943662 | 331           | 1.963830635 | 0.565195256 |
|                             |       | RW-OTC15    | 24        | 30545     | 181           | 28546              | 29545          | 301            | 20.54555    | 413.6546465 | 303           | 1.901884567 | 0.54545469  |
|                             |       | RW-OTC50    | 25        | 23139     | 778           | 22361              | 22203          | 367            | 25.04266    | 439.6785714 | 367           | 3.759702032 | 0.770605784 |
|                             |       | RW-OTC50    | 26        | 19563     | 712           | 29554              | 36441          | 287            | 23.56121    | 499.6543217 | 307           | 3.554546848 | 0.745465455 |
|                             |       | RW-OTC50    | 27        | 29554     | 806           | 19664              | 26222          | 308            | 20.35453    | 387.6546515 | 430           | 3.704654168 | 0.786547888 |

|                      |      |           |    |        |      |        |        |      |           |             |      |             |             |
|----------------------|------|-----------|----|--------|------|--------|--------|------|-----------|-------------|------|-------------|-------------|
| experiment with soil | root | RS-Cont   | 28 | 114185 | 126  | 114059 | 114011 | 294  | 19.85685  | 394.2580645 | 294  | 1.042030745 | 0.278402019 |
|                      |      | RS-Cont   | 29 | 132036 | 181  | 131855 | 131812 | 372  | 25.06248  | 476.2051282 | 372  | 0.988836717 | 0.256811959 |
|                      |      | RS-Cont   | 30 | 64523  | 104  | 64419  | 64385  | 277  | 21.47614  | 436.6       | 277  | 1.046589616 | 0.287839555 |
|                      |      | RS-OTC15  | 31 | 65150  | 49   | 65101  | 65075  | 239  | 20.32363  | 346.4468085 | 239  | 0.85127585  | 0.208411117 |
|                      |      | RS-OTC15  | 32 | 74858  | 52   | 74806  | 74755  | 309  | 22.7524   | 492.9574468 | 309  | 0.949796646 | 0.224502065 |
|                      |      | RS-OTC15  | 33 | 47207  | 26   | 47181  | 47160  | 190  | 17.30089  | 300.6756757 | 190  | 0.990996661 | 0.258410488 |
|                      |      | RS-OTC300 | 34 | 46473  | 36   | 46437  | 46413  | 256  | 22.50009  | 372.4347826 | 256  | 0.99246563  | 0.237250725 |
|                      |      | RS-OTC300 | 35 | 47835  | 69   | 47766  | 47735  | 280  | 23.61061  | 507.2195122 | 280  | 1.015604635 | 0.244444379 |
|                      |      | RS-OTC300 | 36 | 59607  | 23   | 59584  | 59557  | 254  | 20.55766  | 386.0769231 | 254  | 0.907163522 | 0.202961771 |
|                      | leaf | LS-Cont   | 37 | 48158  | 49   | 48109  | 48082  | 132  | 12.92839  | 267.05      | 132  | 0.510500584 | 0.12379832  |
|                      |      | LS-Cont   | 38 | 53287  | 62   | 53225  | 53199  | 127  | 12.26791  | 186.625     | 127  | 0.531614339 | 0.130947911 |
|                      |      | LS-Cont   | 39 | 51391  | 36   | 51355  | 51338  | 135  | 13.71215  | 198.3703704 | 135  | 0.46801724  | 0.105289629 |
|                      |      | LS-OTC15  | 40 | 42337  | 71   | 42266  | 42249  | 116  | 11.55945  | 193         | 116  | 0.47954937  | 0.109240331 |
|                      |      | LS-OTC15  | 41 | 52376  | 43   | 52333  | 52311  | 150  | 12.80193  | 316.05      | 150  | 0.528141064 | 0.120660016 |
|                      |      | LS-OTC15  | 42 | 60690  | 28   | 60662  | 60639  | 143  | 14.13383  | 206.030303  | 143  | 0.396533021 | 0.080472062 |
|                      |      | LS-OTC300 | 43 | 64558  | 43   | 64515  | 64496  | 139  | 12.67732  | 244.12      | 139  | 0.375819512 | 0.079906713 |
|                      |      | LS-OTC300 | 44 | 68334  | 34   | 68300  | 68277  | 139  | 12.51579  | 289.3529412 | 139  | 0.304883874 | 0.057637386 |
|                      |      | LS-OTC300 | 45 | 61744  | 41   | 61703  | 61682  | 128  | 10.24531  | 189.03125   | 128  | 0.338697226 | 0.071305934 |
|                      | soil | S-OTC15   | 46 | 53741  | 894  | 52847  | 52479  | 5701 | 199.23945 | 7304.302045 | 5701 | 9.967879195 | 0.987174276 |
|                      |      | S-OTC15   | 47 | 71497  | 387  | 71110  | 70789  | 5494 | 196.129   | 6423.334416 | 5494 | 9.704116497 | 0.983644407 |
|                      |      | S-OTC15   | 48 | 60525  | 319  | 60206  | 59902  | 5189 | 188.03664 | 6156.667079 | 5189 | 10.35059714 | 0.996531649 |
|                      |      | S-OTC300  | 49 | 85836  | 2903 | 82933  | 82419  | 6179 | 207.1977  | 7808.921569 | 6179 | 9.700119935 | 0.990157073 |
|                      |      | S-OTC300  | 50 | 67038  | 462  | 66576  | 66195  | 5577 | 196.38462 | 6705.826471 | 5577 | 9.782991238 | 0.98623358  |
|                      |      | S-OTC300  | 51 | 74396  | 330  | 74066  | 73763  | 4855 | 172.29061 | 5634.505988 | 4855 | 9.881852771 | 0.990073431 |
|                      |      | S-Cont    | 52 | 41777  | 4274 | 37503  | 36153  | 5119 | 179.28133 | 6101.670103 | 5119 | 10.35684757 | 0.993458879 |
|                      |      | S-Cont    | 53 | 53564  | 4170 | 49394  | 48303  | 5003 | 177.84563 | 6015.962857 | 5003 | 9.70191974  | 0.988991102 |
|                      |      | S-Cont    | 54 | 64071  | 4381 | 59690  | 58453  | 5856 | 199.82035 | 6790.266282 | 5856 | 10.1253905  | 0.988683704 |
