# Supplementary material for: Influence of the Antibiotic Oxytetracycline on the Morphometric Characteristics and Endophytic Bacterial Community of Lettuce (Lactuca sativa L.)
Source: MDPI journal article supplement (doi:10.3390/microorganisms11122828), 2023-11-21
Supplement: s1 [file s1]

**Table S1.** The tables below display the results of difference significance analysis, calculated using the Mann-Whitney test ( $p < 0.05$ ) and the online calculator (<https://www.socscistatistics.com/tests/mannwhitney/default2.aspx>), where “+” – there are differences between samples, “-” – there are no differences between samples

|                                       |                |                |                 |
|---------------------------------------|----------------|----------------|-----------------|
| <b>Figure 1a. Stems.</b>              |                |                |                 |
|                                       | control        | OTC15          | OTC50           |
| control                               |                | +              | +               |
| OTC15                                 | +              |                | -               |
| OTC50                                 | +              | -              |                 |
| <b>Figure 1a. Roots.</b>              |                |                |                 |
|                                       | control        | OTC15          | OTC50           |
| control                               |                | +              | +               |
| OTC15                                 | +              |                | -               |
| OTC50                                 | +              | -              |                 |
| <b>Figure 1b. Biomass</b>             |                |                |                 |
|                                       | control        | OTC15          | OTC50           |
| control                               |                | +              | +               |
| OTC15                                 | +              |                | +               |
| OTC50                                 | +              | +              |                 |
| <b>Figure 1c. Chlorophyll content</b> |                |                |                 |
|                                       | control        | OTC15          | OTC50           |
| control                               |                | +              | +               |
| OTC15                                 | +              |                | +               |
| OTC50                                 | +              | +              |                 |
| <b>Figure 2.</b>                      |                |                |                 |
|                                       | Leaf (control) | Root (control) | Water (control) |
| Leaf (control)                        |                | +              | +               |
| Root (control)                        | +              |                | +               |
| Water (control)                       | +              | +              |                 |
|                                       | Leaf (OTC15)   | Root (OTC15)   | Water (OTC15)   |
| Leaf (OTC15)                          |                | +              | +               |
| Root (OTC15)                          | +              |                | -               |
| Water (OTC15)                         | +              | -              |                 |
|                                       | Leaf (OTC50)   | Root (OTC50)   | Water (OTC50)   |
| Leaf (OTC50)                          |                | +              | +               |
| Root (OTC50)                          | +              |                | +               |
| Water (OTC50)                         | +              | +              |                 |
| <b>Figure 3a.</b>                     |                |                |                 |
|                                       | Leaf (control) | Root (control) | Water (control) |
| Leaf (control)                        |                | +              | +               |
| Root (control)                        | +              |                | +               |
| Water (control)                       | +              | +              |                 |
|                                       | Leaf (OTC15)   | Root (OTC15)   | Water (OTC15)   |
| Leaf (OTC15)                          |                | +              | +               |
| Root (OTC15)                          | +              |                | -               |
| Water (OTC15)                         | +              | -              |                 |
|                                       | Leaf (OTC50)   | Root (OTC50)   | Water (OTC50)   |
| Leaf (OTC50)                          |                | +              | +               |

|                                  |                |                |                 |
|----------------------------------|----------------|----------------|-----------------|
| Root (OTC50)                     | +              |                | -               |
| Water (OTC50)                    | +              | -              |                 |
| <b>Figure 3b. Simpson indice</b> |                |                |                 |
|                                  | Leaf (control) | Root (control) | Water (control) |
| Leaf (control)                   |                | -              | +               |
| Root (control)                   | -              |                | +               |
| Water (control)                  | +              | +              |                 |
|                                  | Leaf (OTC15)   | Root (OTC15)   | Water (OTC15)   |
| Leaf (OTC15)                     |                | -              | +               |
| Root (OTC15)                     | -              |                | +               |
| Water (OTC15)                    | +              | +              |                 |
|                                  | Leaf (OTC50)   | Root (OTC50)   | Water (OTC50)   |
| Leaf (OTC50)                     |                | +              | +               |
| Root (OTC50)                     | +              |                | -               |
| Water (OTC50)                    | +              | -              |                 |
| Shannon indice                   |                |                |                 |
|                                  | Leaf (control) | Root (control) | Water (control) |
| Leaf (control)                   |                | +              | +               |
| Root (control)                   | +              |                | +               |
| Water (control)                  | +              | +              |                 |
|                                  | Leaf (OTC15)   | Root (OTC15)   | Water (OTC15)   |
| Leaf (OTC15)                     |                | +              | +               |
| Root (OTC15)                     | +              |                | +               |
| Water (OTC15)                    | +              | +              |                 |
|                                  | Leaf (OTC50)   | Root (OTC50)   | Water (OTC50)   |
| Leaf (OTC50)                     |                | +              | +               |
| Root (OTC50)                     | +              |                | -               |
| Water (OTC50)                    | +              | -              |                 |
| <b>Figure 4a.</b>                |                |                |                 |
|                                  | Leaf (OTC15)   | Root (OTC15)   |                 |
| Leaf (OTC15)                     |                | +              |                 |
| Root (OTC15)                     | +              |                |                 |
|                                  | Leaf (OTC50)   | Root (OTC50)   |                 |
| Leaf (OTC50)                     |                | +              |                 |
| Root (OTC50)                     | +              |                |                 |
| Figure 4b.                       |                |                |                 |
|                                  | Root (OTC50)   | Water (OTC50)  |                 |
| Root (OTC50)                     |                | +              |                 |
| Water (OTC50)                    | +              |                |                 |
| <b>Figure 5a. Stems</b>          |                |                |                 |
|                                  | control        | OTC15          | OTC300          |
| control                          |                | -              | +               |
| OTC15                            | -              |                | +               |
| OTC300                           | +              | +              |                 |
| Figure 5a. Roots                 |                |                |                 |
|                                  | control        | OTC15          | OTC300          |

|                                |         |       |        |
|--------------------------------|---------|-------|--------|
| control                        |         | -     | +      |
| OTC15                          | -       |       | +      |
| OTC300                         | +       | +     |        |
| Figure 5b. Biomass             |         |       |        |
|                                | control | OTC15 | OTC300 |
| control                        |         | -     | +      |
| OTC15                          | -       |       | +      |
| OTC300                         | +       | +     |        |
| Figure 5c. Chlorophyll content |         |       |        |
|                                | control | OTC15 | OTC300 |
| control                        |         | -     | -      |
| OTC15                          | -       |       | -      |
| OTC300                         | -       | -     |        |

**Figure 6.**

|                |                |                |                |
|----------------|----------------|----------------|----------------|
|                | Leaf (control) | Root (control) | Soil (control) |
| Leaf (control) |                | +              | +              |
| Root (control) | +              |                | +              |
| Soil (control) | +              | +              |                |
|                | Leaf (OTC15)   | Root (OTC15)   | Soil (OTC15)   |
| Leaf (OTC15)   |                | +              | +              |
| Root (OTC15)   | +              |                | +              |
| Soil (OTC15)   | +              | +              |                |
|                | Leaf (OTC300)  | Root (OTC300)  | Soil (OTC300)  |
| Leaf (OTC300)  |                | +              | +              |
| Root (OTC300)  | +              |                | +              |
| Soil (OTC300)  | +              | +              |                |

**Figure 7a.**

|                |                |                |                |
|----------------|----------------|----------------|----------------|
|                | Leaf (control) | Root (control) | Soil (control) |
| Leaf (control) |                | +              | +              |
| Root (control) | +              |                | +              |
| Soil (control) | +              | +              |                |
|                | Leaf (OTC15)   | Root (OTC15)   | Soil (OTC15)   |
| Leaf (OTC15)   |                | +              | +              |
| Root (OTC15)   | +              |                | +              |
| Soil (OTC15)   | +              | +              |                |
|                | Leaf (OTC300)  | Root (OTC300)  | Soil (OTC300)  |
| Leaf (OTC300)  |                | +              | +              |
| Root (OTC300)  | +              |                | +              |
| Soil (OTC300)  | +              | +              |                |

**Figure 7b. Simpson indice**

|                |                |                |                |
|----------------|----------------|----------------|----------------|
|                | Leaf (control) | Root (control) | Soil (control) |
| Leaf (control) |                | -              | -              |
| Root (control) | -              |                | -              |
| Soil (control) | -              | -              |                |
|                | Leaf (OTC15)   | Root (OTC15)   | Soil (OTC15)   |
| Leaf (OTC15)   |                | -              | -              |
| Root (OTC15)   | -              |                | -              |
| Soil (OTC15)   | -              | -              |                |

|                       |                |                |                |
|-----------------------|----------------|----------------|----------------|
|                       | Leaf (OTC300)  | Root (OTC300)  | Soil (OTC300)  |
| Leaf (OTC300)         |                | -              | -              |
| Root (OTC300)         | -              |                | -              |
| Soil (OTC300)         | -              | -              |                |
| <b>Shannon indice</b> |                |                |                |
|                       | Leaf (control) | Root (control) | Soil (control) |
| Leaf (control)        |                | -              | +              |
| Root (control)        | -              |                | +              |
| Soil (control)        | +              | +              |                |
|                       | Leaf (OTC15)   | Root (OTC15)   | Soil (OTC15)   |
| Leaf (OTC15)          |                | -              | +              |
| Root (OTC15)          | -              |                | +              |
| Soil (OTC15)          | +              | +              |                |
|                       | Leaf (OTC300)  | Root (OTC300)  | Soil (OTC300)  |
| Leaf (OTC300)         |                | +              | +              |
| Root (OTC300)         | +              |                | +              |
| Soil (OTC300)         | +              | +              |                |
| <b>Figure 8a.</b>     |                |                |                |
|                       | Leaf (OTC15)   | Root (OTC15)   | Soil (OTC15)   |
| Leaf (OTC15)          |                | +              | +              |
| Root (OTC15)          | +              |                | +              |
| Soil (OTC15)          | +              | +              |                |
|                       | Leaf (OTC300)  | Root (OTC300)  | Soil (OTC300)  |
| Leaf (OTC300)         |                | +              | +              |
| Root (OTC300)         | +              |                | +              |
| Soil (OTC300)         | +              | +              |                |
| <b>Figure 8b.</b>     |                |                |                |
|                       | Root (OTC15)   | Water (OTC15)  | Soil (OTC15)   |
| Root (OTC15)          |                | +              | +              |
| Water (OTC15)         | +              |                | +              |
| Soil (OTC15)          | +              | +              |                |
|                       | Leaf (OTC300)  | Root (OTC300)  | Soil (OTC300)  |
| Leaf (OTC300)         |                | +              | +              |
| Root (OTC300)         | +              |                | +              |
| Soil (OTC300)         | +              | +              |                |
